# Supplementary material
Source: MDPI journal article supplement (https://www.mdpi.com/2076-3417/13/17/9541)
Supplement: s1 [file s1]

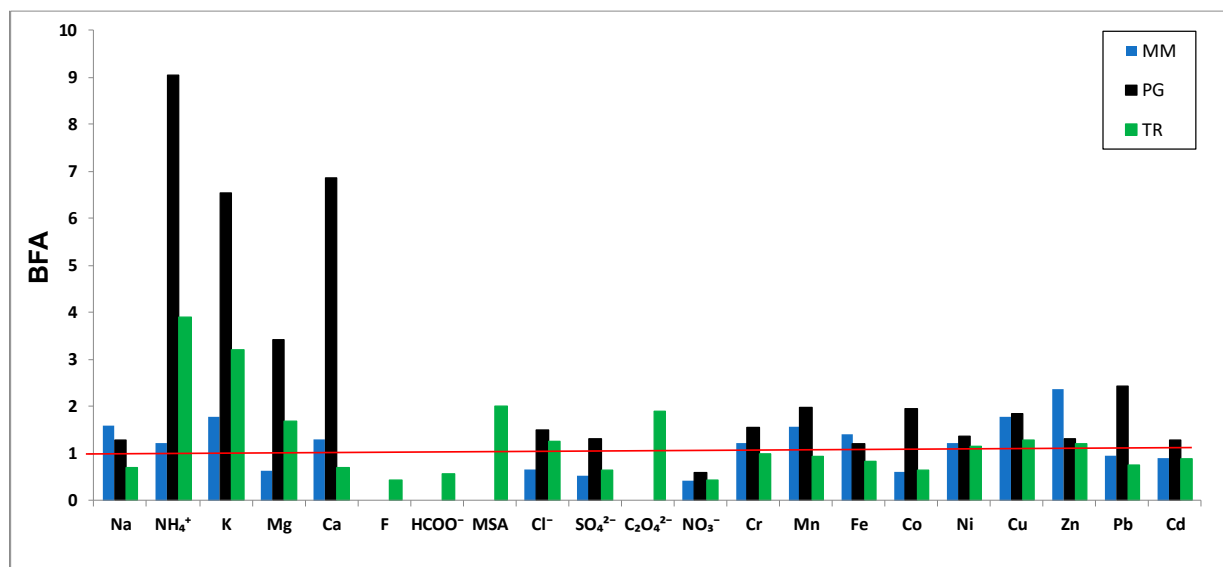

Figure S1. 2019 Experiment: BAFs values observed after 15 days.

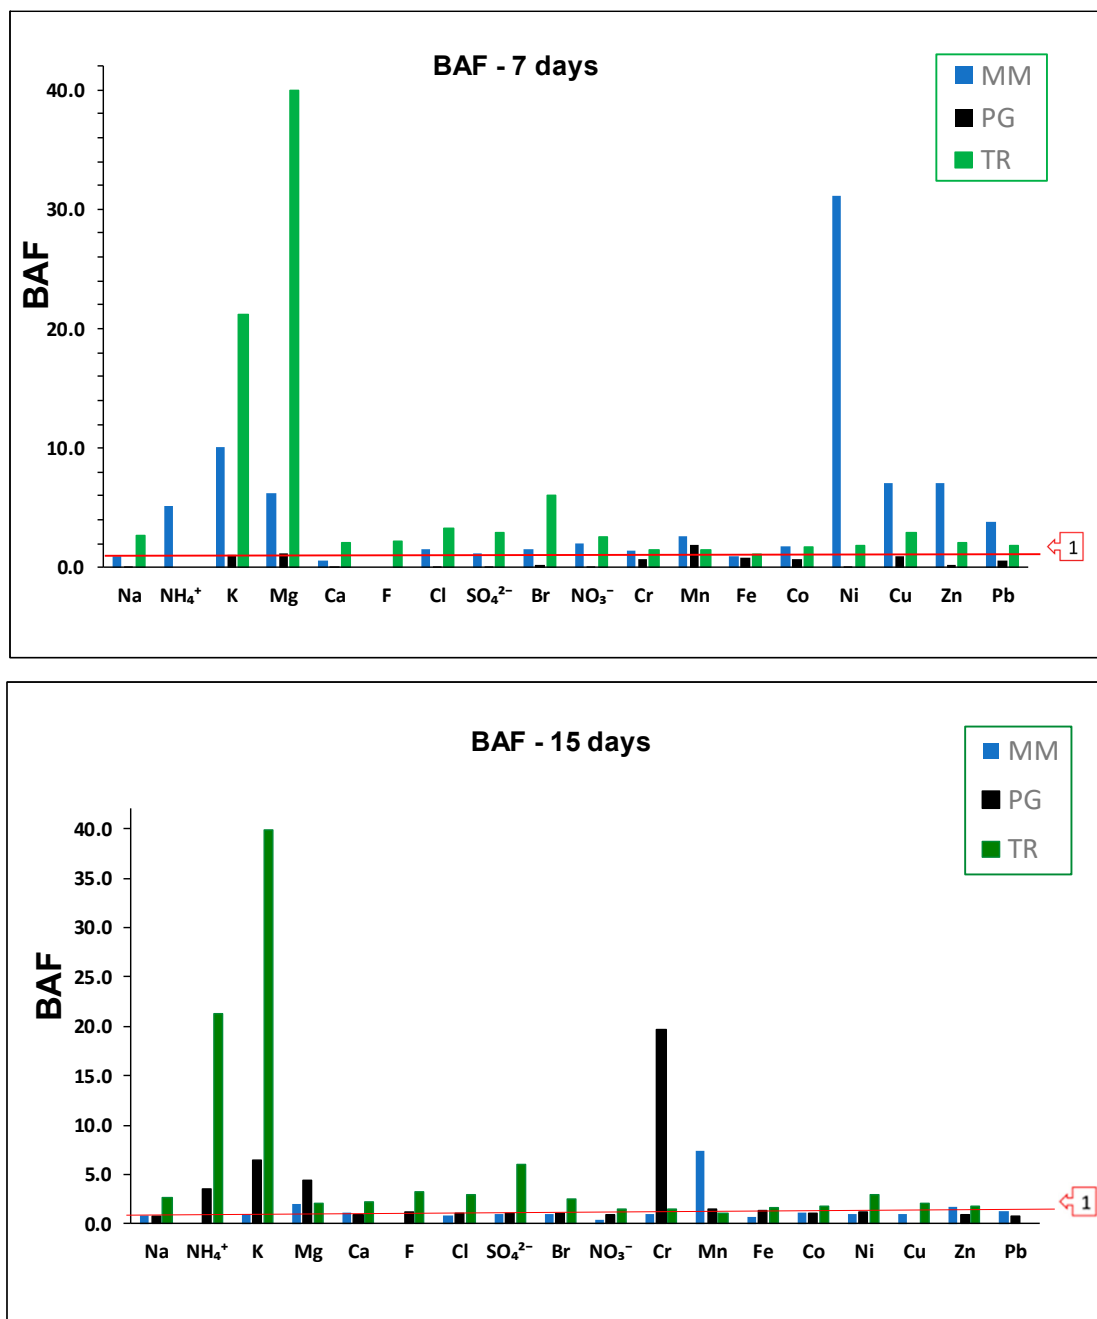

Figure S2. 2021 Experiment: BAFs values observed after 7 and 15 days.

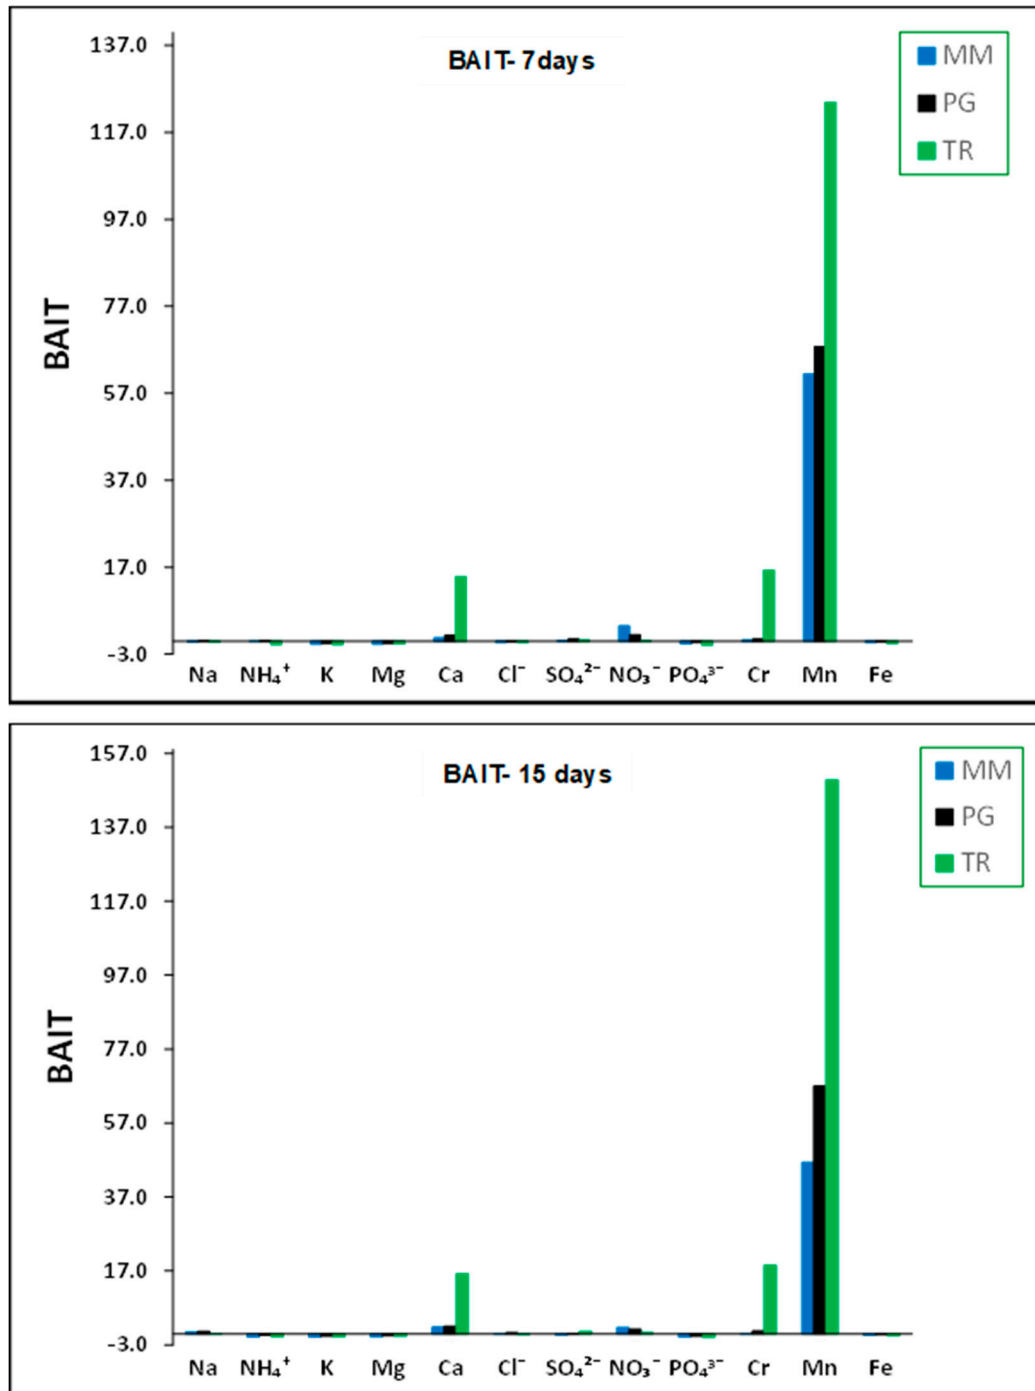

Figure S3. 2021 Experiment: BAITs values observed after 7 and 15 days

**Table S1.** 2019 Experiment: comparison between control and pollen samples fluxes ( $\mu\text{g m}^{-2} \text{d}^{-1}$ ) for the soluble (ionic and metallic) and total metallic fractions. Exposition time 15 days.

|                                  | Na <sup>+</sup> | NH <sub>4</sub> <sup>+</sup> | K <sup>+</sup> | Mg <sup>2+</sup> | Ca <sup>2+</sup> | F <sup>-</sup> | HCOO <sup>-</sup> | MSA  | Cl <sup>-</sup> | NO <sub>2</sub> | SO <sub>4</sub> <sup>2-</sup> | C <sub>2</sub> O <sub>4</sub> <sup>2-</sup> | Br <sup>-</sup> | NO <sub>3</sub> <sup>-</sup> | PO <sub>4</sub> <sup>3-</sup> | Cr    | Mn    | Fe    | Co   | Ni   | Cu   | Zn    | Pb   | Cd   | Ba    | Sr   | Al    |
|----------------------------------|-----------------|------------------------------|----------------|------------------|------------------|----------------|-------------------|------|-----------------|-----------------|-------------------------------|---------------------------------------------|-----------------|------------------------------|-------------------------------|-------|-------|-------|------|------|------|-------|------|------|-------|------|-------|
| <b>MM CNT</b>                    |                 |                              |                |                  |                  |                |                   |      |                 |                 |                               |                                             |                 |                              |                               |       |       |       |      |      |      |       |      |      |       |      |       |
| <i>Soluble ionic fraction</i>    | 203.9           | 53.2                         | 208.0          | 50.7             | 1271.7           | <LOD           | <LOD              | <LOD | 248.04          | <LOD            | 308.3                         | <LOD                                        | <LOD            | 680.00                       | <LOD                          |       |       |       |      |      |      |       |      |      |       |      |       |
| <i>Total metallic fraction</i>   |                 |                              |                |                  |                  |                |                   |      |                 |                 |                               |                                             |                 |                              |                               | 0.1   | 6.1   | 40.7  | 0.1  | 0.5  | 1.6  | 15.2  | 2    | 0.02 | 2.4   | 2.4  | 48.1  |
| <b>MM</b>                        |                 |                              |                |                  |                  |                |                   |      |                 |                 |                               |                                             |                 |                              |                               |       |       |       |      |      |      |       |      |      |       |      |       |
| <i>Soluble ionic fraction</i>    | 195.8           | 106                          | 609.1          | 53.2             | 2725             | 0.1            | 39.1              | 16.3 | 266.7           | <LOD            | 269.7                         | 137.6                                       | <LOD            | 477.3                        | 450                           |       |       |       |      |      |      |       |      |      |       |      |       |
| <i>Soluble metallic fraction</i> |                 |                              |                |                  |                  |                |                   |      |                 |                 |                               |                                             |                 |                              |                               | 0.3   | 2.8   | 5.2   | 0.04 | 0.5  | 1.3  | <LOD  | 0.2  | <LOD | 0.4   | 1.5  | 9.8   |
| <i>Total metallic fraction</i>   |                 |                              |                |                  |                  |                |                   |      |                 |                 |                               |                                             |                 |                              |                               | 0.2   | 15.8  | 94.9  | 0.1  | 1    | 4.7  | 59.5  | 3.1  | 0.03 | 4.8   | 6.1  | 79.2  |
| <b>PG CNT</b>                    |                 |                              |                |                  |                  |                |                   |      |                 |                 |                               |                                             |                 |                              |                               |       |       |       |      |      |      |       |      |      |       |      |       |
| <i>Soluble ionic fraction</i>    | 153.1           | 25.1                         | 247.8          | 45.9             | 600.0            | <LOD           | <LOD              | <LOD | 296.0           | <LOD            | 321.1                         | 83.2                                        | <LOD            | 675.3                        | 41.5                          |       |       |       |      |      |      |       |      |      |       |      |       |
| <i>Total metallic fraction</i>   |                 |                              |                |                  |                  |                |                   |      |                 |                 |                               |                                             |                 |                              |                               | 0.5   | 13.1  | 211   | 0.1  | 0.5  | 9.8  | 73.1  | 10.9 | 0.03 | 162.9 | 9.3  | 207.1 |
| <b>PG</b>                        |                 |                              |                |                  |                  |                |                   |      |                 |                 |                               |                                             |                 |                              |                               |       |       |       |      |      |      |       |      |      |       |      |       |
| <i>Soluble ionic fraction</i>    | 202.1           | 233.4                        | 1664           | 161.5            | 4225             | 5.5            | 97.7              | 35.7 | 453.8           | <LOD            | 435.2                         | 289.6                                       | <LOD            | 408.4                        | 1134                          |       |       |       |      |      |      |       |      |      |       |      |       |
| <i>Soluble metallic fraction</i> |                 |                              |                |                  |                  |                |                   |      |                 |                 |                               |                                             |                 |                              |                               | 0.9   | 10.7  | 262.4 | 0.2  | 1    | 14.4 | 46.1  | 4.5  | 0.02 | 55.8  | 6.2  | 9.5   |
| <i>Total metallic fraction</i>   |                 |                              |                |                  |                  |                |                   |      |                 |                 |                               |                                             |                 |                              |                               | 0.8   | 26.5  | 261.7 | 0.2  | 0.7  | 18.6 | 97.8  | 27.3 | 0.04 | 264.1 | 15.6 | 213.1 |
| <b>TR CNT</b>                    |                 |                              |                |                  |                  |                |                   |      |                 |                 |                               |                                             |                 |                              |                               |       |       |       |      |      |      |       |      |      |       |      |       |
| <i>Soluble ionic fraction</i>    | 160.2           | 23.7                         | 230.9          | 89.0             | 10133            | 485.7          | 717.8             | 11.8 | 215.4           | 7.2             | 728.4                         | 83.9                                        | <LOD            | 712.3                        | <LOD                          |       |       |       |      |      |      |       |      |      |       |      |       |
| <i>Total metallic fraction</i>   |                 |                              |                |                  |                  |                |                   |      |                 |                 |                               |                                             |                 |                              |                               | 100.7 | 469.8 | 1108  | 1.6  | 31.2 | 7.5  | 137.1 | 19.6 | 0.1  | 39    | 51   | 3513  |
| <b>TR</b>                        |                 |                              |                |                  |                  |                |                   |      |                 |                 |                               |                                             |                 |                              |                               |       |       |       |      |      |      |       |      |      |       |      |       |
| <i>Soluble ionic fraction</i>    | 128.6           | 105.9                        | 844.6          | 171.1            | 8020             | 246.9          | 471.2             | 26.9 | 310.7           | <LOD            | 545.2                         | 182.3                                       | 29.1            | 359                          | 140.6                         |       |       |       |      |      |      |       |      |      |       |      |       |
| <i>Soluble metallic fraction</i> |                 |                              |                |                  |                  |                |                   |      |                 |                 |                               |                                             |                 |                              |                               | 5.7   | 16.8  | 3.4   | 0.1  | 1.4  | 4.6  | 24.7  | 1    | 0.02 | 2.5   | 7.1  | 11.7  |
| <i>Total metallic fraction</i>   |                 |                              |                |                  |                  |                |                   |      |                 |                 |                               |                                             |                 |                              |                               | 115.6 | 511   | 1068  | 1.2  | 40.6 | 11.1 | 188.3 | 17.1 | 0.1  | 42.9  | 59.9 | 4012  |

TR, Terni; PG, Perugia; MM, Monte Martano

**Table S2.** 2021 Experiment: comparison between control and pollen samples fluxes ( $\mu\text{g m}^{-2} \text{d}^{-1}$ ) for the soluble (ionic and metallic) and metallic fractions.  
Exposition time 7 and 15 days

|                | Na <sup>+</sup> | NH <sub>4</sub> <sup>+</sup> | K <sup>+</sup> | Mg <sup>2+</sup> | Ca <sup>2+</sup> | F <sup>-</sup> | HCOO <sup>-</sup> | MSA   | Cl <sup>-</sup> | NO <sub>2</sub> | SO <sub>4</sub> <sup>2-</sup> | C <sub>2</sub> O <sub>4</sub> <sup>2-</sup> | Br <sup>-</sup> | NO <sub>3</sub> <sup>-</sup> | PO <sub>4</sub> <sup>3-</sup> | Cr    | Mn    | Fe    | Co  | Ni    | Cu   | Zn    | Pb   | Cd    | Ba    | Sr   | Al     |
|----------------|-----------------|------------------------------|----------------|------------------|------------------|----------------|-------------------|-------|-----------------|-----------------|-------------------------------|---------------------------------------------|-----------------|------------------------------|-------------------------------|-------|-------|-------|-----|-------|------|-------|------|-------|-------|------|--------|
| <b>7 days</b>  |                 |                              |                |                  |                  |                |                   |       |                 |                 |                               |                                             |                 |                              |                               |       |       |       |     |       |      |       |      |       |       |      |        |
| <b>MM CNT</b>  | 195.0           | 98.3                         | 226.6          | 29.2             | 3887.2           | < LOD          | < LOD             | < LOD | 322.30          | < LOD           | 970.2                         | < LOD                                       | 129.7           | 1569.2                       | < LOD                         | 2.6   | 25    | 942   | 0.5 | 0.5   | 2.6  | 11.4  | 2.5  | < LOD | 15.5  | 12.5 | 1465   |
| <b>MM</b>      | 175.7           | 456.5                        | 2068           | 163.6            | 2164.5           | < LOD          | 51.1              | < LOD | 452.4           | < LOD           | 1082                          | < LOD                                       | 181.7           | 2864                         | 1794.9                        | 3.4   | 58.8  | 769.2 | 0.8 | 14.1  | 16.7 | 72.8  | 8.8  | < LOD | 24.6  | 23.1 | 1329   |
| <b>PG CNT</b>  | 234.2           | < LOD                        | 312.1          | 20.4             | 4872.2           | < LOD          | 13.7              | < LOD | 410.4           | < LOD           | 1132                          | < LOD                                       | 127.7           | 1232                         | < LOD                         | 0.6   | 3.2   | 101.9 | 0.1 | 9.9   | 3.9  | 74.2  | 1.2  | < LOD | 98.9  | 30.6 | 127.5  |
| <b>PG</b>      | 263.5           | 547.4                        | 3583           | 279.6            | 3217.1           | < LOD          | 153.3             | < LOD | 684.9           | < LOD           | 1609                          | 31.6                                        | 275.8           | 1714                         | 3331.4                        | 4.6   | 71    | 1003  | 0.8 | 7.9   | 39.7 | 148.9 | 7.6  | < LOD | 159.3 | 28.2 | 1459   |
| <b>TR CNT</b>  | 281.5           | < LOD                        | 281.8          | 21.8             | 41008.8          | 1003.7         | 304.5             | < LOD | 624.1           | < LOD           | 1882                          | < LOD                                       | 202.8           | 1126                         | < LOD                         | 146.1 | 345.3 | 1922  | 1.7 | 39.9  | 18.5 | 88.2  | 26.3 | < LOD | 90.8  | 81.5 | 5760   |
| <b>TR</b>      | 388.3           | 221.8                        | 3143           | 457.2            | 44711.2          | 1167.8         | 566.8             | 35.8  | 1058            | < LOD           | 2929                          | < LOD                                       | 643.3           | 1500                         | 154.9                         | 111   | 267.6 | 1081  | 1.5 | 39.1  | 28.2 | 95.4  | 25   | < LOD | 69.8  | 94   | 3025   |
| <b>15 days</b> |                 |                              |                |                  |                  |                |                   |       |                 |                 |                               |                                             |                 |                              |                               |       |       |       |     |       |      |       |      |       |       |      |        |
| <b>MM CNT</b>  | 223.4           | < LOD                        | 661.2          | 39.2             | 1943.9           | < LOD          | 51.1              | < LOD | 408.8           | < LOD           | 494.7                         | < LOD                                       | 297.3           | 985.3                        | 51.3                          | 2.3   | 24.0  | 406.3 | 0.5 | 10.4  | 5.8  | 28.0  | 3.5  | < LOD | 13.6  | 14.5 | 821.3  |
| <b>MM</b>      | 216.8           | 49.4                         | 690.4          | 87.3             | 2310.3           | < LOD          | 51.0              | < LOD | 443.5           | < LOD           | 514.8                         | < LOD                                       | 121.6           | 1137.7                       | 408.4                         | 1.7   | 29.7  | 456.8 | 0.5 | 19.6  | 8.5  | 33.0  | 2.2  | < LOD | 13.1  | 15.7 | 887.1  |
| <b>PG CNT</b>  | 232.9           | 42.0                         | 187.9          | 33.7             | 2026.2           | < LOD          | 53.5              | < LOD | 399.7           | < LOD           | 542.2                         | < LOD                                       | 101.3           | 791.6                        | 52.6                          | 1.7   | 23.5  | 426.7 | 0.4 | 17.8  | 17.1 | 89.1  | 5.9  | < LOD | 107.2 | 24.9 | 699.9  |
| <b>PG</b>      | 230.9           | 183.2                        | 1486.0         | 182.3            | 2442.9           | 5.1            | 76.1              | < LOD | 562.1           | < LOD           | 694.9                         | 17.0                                        | 126.7           | 940.1                        | 1277.8                        | 3.2   | 41.7  | 570.7 | 0.6 | < LOD | 21.1 | 86.3  | 4.6  | < LOD | 110.7 | 19.7 | 866.2  |
| <b>TR CNT</b>  | 198.1           | < LOD                        | 184.3          | 29.8             | 24714.4          | 812.2          | 185.6             | 17.9  | 453.2           | < LOD           | 1595.7                        | < LOD                                       | 135.2           | 754.9                        | < LOD                         | 60.0  | 125.2 | 592.3 | 0.5 | 16.9  | 6.1  | 31.4  | 11.3 | < LOD | 43.0  | 29.8 | 1551.7 |
| <b>TR</b>      | 221.0           | 116.5                        | 1651.6         | 235.4            | 22161.1          | 578.6          | 554.6             | 28.0  | 624.5           | < LOD           | 1726.5                        | < LOD                                       | 306.6           | 862.3                        | 48.6                          | 57.2  | 147.3 | 578.4 | 0.7 | 11.9  | 14.3 | 44.3  | 15.8 | < LOD | 44.6  | 41.4 | 1379.7 |

TR, Terni; PG, Perugia; MM, Monte Martano
